# Supplementary material for: Carbon Capture from Biogas by Deep Eutectic Solvents: A COSMO Study to Evaluate the Effect of Impurities on Solubility and Selectivity
Source: MDPI journal article supplement (doi:10.3390/cleantechnol3020029), 2021-06-01
Supplement: s1 [file s1]

*Supplementary Information*

# **Carbon Capture from Biogas by Deep Eutectic Solvents: A COSMO Study to Evaluate the Effect of Impurities on Solubility and Selectivity**

**Thomas Quaid, and M. Toufiq Reza\***

Department of Biomedical and Chemical Engineering and Sciences, Florida Institute of  
Technology, 150 West University Boulevard, Melbourne, Florida 32901, USA.;  
tquaid2018@my.fit.edu

\* Correspondence: [treza@fit.edu](mailto:treza@fit.edu); (+1 321 674 8578)

| Solubility       | CO <sub>2</sub> |       |       | CH <sub>4</sub> |       |       | CO <sub>2</sub> |       |       | CH <sub>4</sub> |       |       | CO <sub>2</sub> |       |       | CH <sub>4</sub> |       |       |
|------------------|-----------------|-------|-------|-----------------|-------|-------|-----------------|-------|-------|-----------------|-------|-------|-----------------|-------|-------|-----------------|-------|-------|
| Temp.            | 25 °C           | 25 °C | 25 °C | 25 °C           | 25 °C | 25 °C | 37 °C           | 37 °C | 37 °C | 37 °C           | 37 °C | 37 °C | 55 °C           | 55 °C | 55 °C | 55 °C           | 55 °C | 55 °C |
| Mol %            | 1%              | 3%    | 5%    | 1%              | 3%    | 5%    | 1%              | 3%    | 5%    | 1%              | 3%    | 5%    | 1%              | 3%    | 5%    | 1%              | 3%    | 5%    |
| H <sub>2</sub> O | 1.00            | 0.98  | 0.96  | 0.99            | 0.98  | 0.96  | 1.00            | 0.98  | 0.96  | 0.99            | 0.98  | 0.96  | 1.00            | 0.98  | 0.96  | 0.99            | 0.98  | 0.96  |
| CO <sub>2</sub>  | -               | -     | -     | 1.00            | 1.00  | 0.99  | -               | -     | -     | 1.00            | 1.00  | 1.00  | -               | -     | -     | 1.00            | 1.00  | 1.00  |
| CH <sub>4</sub>  | 1.00            | 1.00  | 1.00  | -               | -     | -     | 1.00            | 1.00  | 1.00  | -               | -     | -     | 1.00            | 1.00  | 1.01  | -               | -     | -     |
| Octa             | 1.00            | 1.02  | 1.07  | 1.00            | 1.04  | 1.09  | 1.00            | 1.03  | 1.08  | 1.01            | 1.05  | 1.11  | 1.01            | 1.04  | 1.10  | 1.01            | 1.06  | 1.13  |
| Deca             | 1.00            | 1.04  | 1.10  | 1.01            | 1.06  | 1.14  | 1.01            | 1.05  | 1.12  | 1.01            | 1.07  | 1.16  | 1.01            | 1.06  | 1.14  | 1.02            | 1.09  | 1.19  |
| H <sub>2</sub> S | 1.00            | 1.01  | 1.01  | 0.99            | 0.98  | 0.97  | 1.00            | 1.01  | 1.01  | 1.00            | 0.99  | 0.98  | 1.00            | 1.01  | 1.01  | 1.00            | 0.99  | 0.98  |
| NH <sub>3</sub>  | 1.01            | 1.02  | 1.04  | 1.00            | 1.01  | 1.02  | 1.01            | 1.02  | 1.04  | 1.00            | 1.01  | 1.01  | 1.01            | 1.02  | 1.04  | 1.00            | 1.01  | 1.01  |
| N <sub>2</sub>   | 1.01            | 1.04  | 1.07  | 1.00            | 1.00  | 1.00  | 1.01            | 1.04  | 1.07  | 1.00            | 1.00  | 1.00  | 1.01            | 1.04  | 1.07  | 1.00            | 1.00  | 1.01  |
| Acetone          | 1.01            | 1.03  | 1.05  | 1.01            | 1.02  | 1.04  | 1.01            | 1.03  | 1.05  | 1.01            | 1.02  | 1.04  | 1.01            | 1.03  | 1.05  | 1.01            | 1.02  | 1.04  |
| SO <sub>2</sub>  | 1.00            | 1.00  | 1.00  | 1.00            | 0.99  | 0.98  | 1.00            | 1.00  | 1.00  | 1.00            | 0.99  | 0.99  | 1.00            | 1.00  | 1.00  | 1.00            | 0.99  | 0.99  |

**Table S1.** Normalized values for solubility of CO<sub>2</sub> and CH<sub>4</sub> at various mole percentages in ChCl: EG and at varying temperatures. The values are normalized to fresh solvent solubilities of respective CO<sub>2</sub> and CH<sub>4</sub>.

| Solubility       | CO <sub>2</sub> |       |       | CH <sub>4</sub> |       |       | CO <sub>2</sub> |       |       | CH <sub>4</sub> |       |       | CO <sub>2</sub> |       |       | CH <sub>4</sub> |       |       |
|------------------|-----------------|-------|-------|-----------------|-------|-------|-----------------|-------|-------|-----------------|-------|-------|-----------------|-------|-------|-----------------|-------|-------|
| Temp.            | 25 °C           | 25 °C | 25 °C | 25 °C           | 25 °C | 25 °C | 37 °C           | 37 °C | 37 °C | 37 °C           | 37 °C | 37 °C | 55 °C           | 55 °C | 55 °C | 55 °C           | 55 °C | 55 °C |
| Mol %            | 1%              | 3%    | 5%    | 1%              | 3%    | 5%    | 1%              | 3%    | 5%    | 1%              | 3%    | 5%    | 1%              | 3%    | 5%    | 1%              | 3%    | 5%    |
| H <sub>2</sub> O | 1.02            | 0.99  | 0.97  | 0.99            | 0.98  | 0.96  | 1.01            | 0.99  | 0.97  | 0.99            | 0.98  | 0.96  | 1.00            | 0.98  | 0.96  | 0.99            | 0.98  | 0.97  |
| CO <sub>2</sub>  | -               | -     | -     | 1.00            | 1.00  | 1.00  | -               | -     | -     | 1.00            | 1.00  | 1.00  | -               | -     | -     | 1.00            | 1.00  | 1.00  |
| CH <sub>4</sub>  | 1.03            | 1.01  | 1.01  | -               | -     | -     | 1.02            | 1.01  | 1.01  | -               | -     | -     | 1.00            | 1.00  | 1.01  | -               | -     | -     |
| Octa             | 1.04            | 1.03  | 1.06  | 1.02            | 1.06  | 1.10  | 1.04            | 1.03  | 1.06  | 1.02            | 1.06  | 1.10  | 1.01            | 1.04  | 1.07  | 1.02            | 1.06  | 1.10  |
| Deca             | 1.05            | 1.04  | 1.08  | 1.02            | 1.07  | 1.13  | 1.04            | 1.04  | 1.08  | 1.02            | 1.08  | 1.13  | 1.01            | 1.05  | 1.09  | 1.02            | 1.08  | 1.13  |
| H <sub>2</sub> S | 1.03            | 1.01  | 1.00  | 1.00            | 0.99  | 0.99  | 1.02            | 1.00  | 1.00  | 1.00            | 0.99  | 0.99  | 1.00            | 1.00  | 1.00  | 1.00            | 0.99  | 0.99  |
| NH <sub>3</sub>  | 1.03            | 1.01  | 1.01  | 1.00            | 0.99  | 0.98  | 1.02            | 1.01  | 1.01  | 1.00            | 0.99  | 0.98  | 1.00            | 1.01  | 1.01  | 1.00            | 0.99  | 0.98  |
| N <sub>2</sub>   | 1.04            | 1.02  | 1.05  | 1.00            | 1.00  | 1.01  | 1.03            | 1.02  | 1.05  | 1.00            | 1.00  | 1.01  | 1.01            | 1.02  | 1.04  | 1.00            | 1.00  | 1.01  |
| Acetone          | 1.04            | 1.02  | 1.03  | 1.00            | 1.01  | 1.01  | 1.03            | 1.02  | 1.03  | 1.00            | 1.01  | 1.01  | 1.00            | 1.01  | 1.03  | 1.00            | 1.01  | 1.01  |
| SO <sub>2</sub>  | 1.03            | 1.00  | 0.99  | 1.00            | 0.99  | 0.99  | 1.02            | 1.00  | 0.99  | 1.00            | 0.99  | 0.99  | 1.00            | 1.00  | 0.99  | 1.00            | 1.00  | 0.99  |

**Table S2.** Normalized values for solubility of CO<sub>2</sub> and CH<sub>4</sub> at various mole percentages in N4Cl: EG and at varying temperatures. The values are normalized to fresh solvent solubilities of respective CO<sub>2</sub> and CH<sub>4</sub>.

| Solubility       | CO <sub>2</sub> |       |       | CH <sub>4</sub> |       |       | CO <sub>2</sub> |       |       | CH <sub>4</sub> |       |       | CO <sub>2</sub> |       |       | CH <sub>4</sub> |       |       |
|------------------|-----------------|-------|-------|-----------------|-------|-------|-----------------|-------|-------|-----------------|-------|-------|-----------------|-------|-------|-----------------|-------|-------|
| Temp.            | 25 °C           | 25 °C | 25 °C | 25 °C           | 25 °C | 25 °C | 37 °C           | 37 °C | 37 °C | 37 °C           | 37 °C | 37 °C | 55 °C           | 55 °C | 55 °C | 55 °C           | 55 °C | 55 °C |
| Mol %            | 1%              | 3%    | 5%    | 1%              | 3%    | 5%    | 1%              | 3%    | 5%    | 1%              | 3%    | 5%    | 1%              | 3%    | 5%    | 1%              | 3%    | 5%    |
| H <sub>2</sub> O | 1.02            | 1.00  | 0.98  | 0.99            | 0.98  | 0.97  | 1.01            | 1.00  | 0.98  | 0.99            | 0.98  | 0.97  | 1.01            | 0.99  | 0.97  | 0.99            | 0.98  | 0.97  |
| CO <sub>2</sub>  | -               | -     | -     | 1.00            | 0.99  | 0.99  | -               | -     | -     | 1.00            | 0.99  | 0.99  | -               | -     | -     | 1.00            | 0.99  | 0.99  |
| CH <sub>4</sub>  | 1.03            | 1.01  | 1.00  | -               | -     | -     | 1.02            | 1.00  | 1.00  | -               | -     | -     | 1.01            | 1.00  | 0.99  | -               | -     | -     |
| Octa             | 1.03            | 1.01  | 1.02  | 1.01            | 1.02  | 1.04  | 1.03            | 1.01  | 1.02  | 1.01            | 1.02  | 1.04  | 1.02            | 1.01  | 1.02  | 1.01            | 1.02  | 1.04  |
| Deca             | 1.04            | 1.01  | 1.02  | 1.01            | 1.03  | 1.05  | 1.03            | 1.01  | 1.02  | 1.01            | 1.03  | 1.05  | 1.02            | 1.01  | 1.03  | 1.01            | 1.03  | 1.05  |
| H <sub>2</sub> S | 1.03            | 1.01  | 1.00  | 1.00            | 0.99  | 0.98  | 1.02            | 1.00  | 0.99  | 1.00            | 0.99  | 0.98  | 1.01            | 1.00  | 0.99  | 1.00            | 0.99  | 0.98  |
| NH <sub>3</sub>  | 1.03            | 1.01  | 1.00  | 1.00            | 0.98  | 0.97  | 1.02            | 1.00  | 1.00  | 1.00            | 0.98  | 0.97  | 1.01            | 1.00  | 1.00  | 1.00            | 0.98  | 0.97  |
| N <sub>2</sub>   | 1.03            | 1.01  | 1.02  | 1.00            | 1.00  | 0.99  | 1.02            | 1.01  | 1.01  | 1.00            | 1.00  | 0.99  | 1.02            | 1.01  | 1.01  | 1.00            | 1.00  | 0.99  |
| Acetone          | 1.03            | 1.01  | 1.01  | 1.00            | 0.99  | 0.99  | 1.02            | 1.01  | 1.00  | 1.00            | 0.99  | 0.99  | 1.01            | 1.00  | 1.00  | 1.00            | 0.99  | 0.99  |
| SO <sub>2</sub>  | 1.02            | 1.00  | 0.99  | 1.00            | 0.99  | 0.98  | 1.02            | 1.00  | 0.99  | 1.00            | 0.99  | 0.98  | 1.01            | 0.99  | 0.98  | 1.00            | 0.99  | 0.98  |

**Table S3.** Normalized values for solubility of CO<sub>2</sub> and CH<sub>4</sub> at various mole percentages in N4Br: DA and at varying temperatures. The values are normalized to fresh solvent solubilities of respective CO<sub>2</sub> and CH<sub>4</sub>.

| Solubility       | CO <sub>2</sub> |       |       | CH <sub>4</sub> |       |       | CO <sub>2</sub> |       |       | CH <sub>4</sub> |       |       | CO <sub>2</sub> |       |       | CH <sub>4</sub> |       |       |
|------------------|-----------------|-------|-------|-----------------|-------|-------|-----------------|-------|-------|-----------------|-------|-------|-----------------|-------|-------|-----------------|-------|-------|
| Temp.            | 25 °C           | 25 °C | 25 °C | 25 °C           | 25 °C | 25 °C | 37 °C           | 37 °C | 37 °C | 37 °C           | 37 °C | 37 °C | 55 °C           | 55 °C | 55 °C | 55 °C           | 55 °C | 55 °C |
| Mol %            | 1%              | 3%    | 5%    | 1%              | 3%    | 5%    | 1%              | 3%    | 5%    | 1%              | 3%    | 5%    | 1%              | 3%    | 5%    | 1%              | 3%    | 5%    |
| H <sub>2</sub> O | 1.03            | 1.02  | 0.99  | 1.00            | 0.98  | 0.97  | 1.02            | 1.00  | 0.98  | 1.00            | 0.98  | 0.97  | 1.01            | 0.99  | 0.98  | 1.00            | 0.98  | 0.97  |
| CO <sub>2</sub>  | -               | -     | -     | 1.00            | 0.99  | 0.99  | -               | -     | -     | 1.00            | 0.99  | 0.99  | -               | -     | -     | 1.00            | 0.99  | 0.99  |
| CH <sub>4</sub>  | 1.04            | 1.03  | 1.00  | -               | -     | -     | 1.03            | 1.00  | 1.00  | -               | -     | -     | 1.02            | 1.00  | 0.99  | -               | -     | -     |
| Octa             | 1.04            | 1.04  | 1.01  | 1.00            | 1.01  | 1.02  | 1.03            | 1.01  | 1.01  | 1.00            | 1.01  | 1.02  | 1.02            | 1.01  | 1.01  | 1.00            | 1.01  | 1.02  |
| Deca             | 1.04            | 1.05  | 1.02  | 1.00            | 1.02  | 1.03  | 1.03            | 1.01  | 1.02  | 1.00            | 1.02  | 1.03  | 1.02            | 1.01  | 1.02  | 1.00            | 1.02  | 1.03  |
| H <sub>2</sub> S | 1.03            | 1.03  | 1.00  | 1.00            | 0.99  | 0.98  | 1.02            | 1.00  | 0.99  | 1.00            | 0.99  | 0.98  | 1.01            | 1.00  | 0.99  | 1.00            | 0.99  | 0.98  |
| NH <sub>3</sub>  | 1.04            | 1.03  | 1.01  | 1.00            | 0.99  | 0.97  | 1.03            | 1.01  | 1.00  | 1.00            | 0.99  | 0.97  | 1.02            | 1.00  | 1.00  | 1.00            | 0.99  | 0.98  |
| N <sub>2</sub>   | 1.04            | 1.04  | 1.01  | 1.00            | 0.99  | 0.99  | 1.03            | 1.01  | 1.01  | 1.00            | 0.99  | 0.99  | 1.02            | 1.01  | 1.01  | 1.00            | 0.99  | 0.99  |
| Acetone          | 1.04            | 1.04  | 1.01  | 1.00            | 0.99  | 0.98  | 1.03            | 1.01  | 1.00  | 1.00            | 0.99  | 0.98  | 1.02            | 1.00  | 1.00  | 1.00            | 0.99  | 0.98  |
| SO <sub>2</sub>  | 1.03            | 1.02  | 1.00  | 1.00            | 0.99  | 0.98  | 1.02            | 1.00  | 0.99  | 1.00            | 0.99  | 0.98  | 1.01            | 1.00  | 0.99  | 1.00            | 0.99  | 0.98  |

**Table S4.** Normalized values for solubility of CO<sub>2</sub> and CH<sub>4</sub> at various mole percentages in N8Br: DA and at varying temperatures. The values are normalized to fresh solvent solubilities of respective CO<sub>2</sub> and CH<sub>4</sub>.
